# Supplementary material for: Risk-informed representative earthquake scenarios for Valparaíso and Viña del Mar, Chile
Source: Copernicus journal article supplement (doi:10.5194/nhess-2023-186), 2023-11-07
Supplement: Supplementary file [file nhess-2023-186-AC2-supplement.pdf]

## Reply to reviewer #2 of “Risk-informed representative earthquake scenarios for Valparaíso and Viña del Mar, Chile”

Reviewer comments are repeated here in black, our response is in [blue font](#). Text from the paper is given in *italics*.

RC2: 'Comment on nness-2023-186', Anonymous Referee #2, 20 Nov 2023

The manuscript with title “Risk-informed representative earthquake scenarios for Valparaíso and Viña del Mar, Chile” has as objective setting a criterion for selecting earthquake scenarios to carry out specific studies and activities around disaster risk management and reduction. Overall, the paper is well written and structured, although the manuscript could benefit from adding additional explanations and definitions of multiple concepts and input data which are required for its application. My recommendation is to carry out a major revision before it can be accepted.

We thank you for the positive feedback and your helpful comments. We have considered them in preparing the most recent version of the manuscript. We reply to your comments in the following paragraphs.

Below, I provide general and specific comments that authors may find useful.

### General comments

1. My main concern is that the manuscript does not include in any section a clear explanation of why this proposed approach is better than the “classic” loss disaggregation obtained from an event loss table and used, for over 10 years, in the catastrophe risk modelling field.

This point was also brought up by another reviewer, and we now contrast and compare our approach to the “classic” loss disaggregation, as proposed by Goda and Hong (2009) and Jayaram and Baker (2009b), see also our response to major comments 2 and 4 of reviewer 1. We now evaluate scenarios with both approaches. As we discuss, however, we feel that our definition has a more straightforward interpretation.

Among other texts, we added the following to address this point.

In the introduction:

*The above concepts were extended to loss disaggregation to find earthquake scenarios in terms of magnitude and hypocentral distance that exceed a loss threshold for building stocks (Goda and Hong, 2009) or infrastructure (Jayaram and*

*Baker, 2009b) (...). The definition of Rosero-Velásquez and Straub (2022) differs from the loss disaggregation presented by Goda and Hong (2009) and Jayaram and Baker (2009b) because the latter define the representative scenario as the most likely one to exceed the t-year loss. In this contribution, we compare the two definitions and argue that a definition in terms of the occurrence of the t-year loss is more consistent in most cases.*

In Section 2:

*An alternative definition can be formulated in terms of loss exceedance instead of loss occurrence:*

$$\theta_t^{exc} = \max_{\theta} f_{\theta|L}(\theta|L \geq l_t) \quad (4)$$

*In such case, Eq. (4) defines the scenario that is most likely to exceed  $l_t$ . This is the definition corresponding to the classical loss disaggregation proposed by Goda and Hong (2009) and Jayaram and Baker (2009b). We note that with this definition, in general, the scenario representative of a t-year loss will have a return period higher than t. Hence, we find its interpretation more difficult, and prefer the definition in Eq. (3). A similar observation was made by Fox et al. (2016) for the case of hazard disaggregation. Nevertheless, we propose algorithms to evaluate the representative scenarios according to the two definitions and compare the resulting scenarios.*

In the discussion section:

*We presented the evaluation of representative earthquake scenarios based on the loss occurrence and the loss exceedance approach; the latter coincides with the loss disaggregation method (Goda and Hong, 2009; Jayaram and Baker, 2009b). In the illustrative example of Section 4.2, we compare the results of the two approaches. For the case of hazard disaggregation, it has been proposed in the literature that the results of both approaches should be reported (Fox, 2023). However, we decided against reporting the scenarios of the exceedance approach for the Valparaíso and Viña del Mar communes, to avoid confusion. We find the loss occurrence approach to have a more intuitive interpretation. Scenarios identified with this approach correspond to a loss that is the t-year loss, which can be reported jointly with the scenarios. They are the most likely scenarios leading to this value (which on average is exceeded once in t years). By contrast, we find it difficult to communicate the meaning of the scenarios with the loss exceedance approach, and we believe it will be mostly misunderstood. Scenarios obtained with the loss occurrence approach can be described as "representative of a loss that is exceeded on average once in t years". For the loss exceedance approach, one would need to describe scenarios as "representative of the losses that would occur when conditioning on a loss at least as large as the one that would be exceeded once in t years", which seems too convoluted to communicate effectively. Nor is it easy to conceive of a risk management activity for which such a definition would be more appropriate.*

*To evaluate the representative scenarios, we adapted the methodology of Rosero-Velásquez and Straub (2022). The methodology leads to lower computational cost in terms of loss evaluations compared to the classical loss disaggregation. By incorporating active learning, the methodology concentrates the conditional loss evaluations around the scenarios that most likely produce the  $t$ -year loss value  $l_t$ . This concentration of samples around the solution and the smooth approximation of the conditional density with KDE make the methodology more suitable for selecting representative scenarios with a loss occurrence approach. For this approach, the classical loss disaggregation has to rely on the numerical derivative of the empirical CDF (Baker et al., 2021).*

2. I suggest authors to review previous works on different topics covered by this manuscript and include several references that in my opinion are missing. I will provide examples of this in the specific comments section.

We address the suggestions in the specific comments section. We also added some additional literature beyond those pointed out by the reviewer.

3. For the application of this methodology, an event-based earthquake risk assessment must be carried out. However, this is never mentioned or explained in detail and the equations that show how the loss computations are performed are not explicit enough for this.

We added a sentence in Section 2 to link the calculation of the loss-exceedance function and event-based earthquake risk assessment more explicitly:

*Because of the randomness and uncertainty in the earthquake scenario, GMM, vulnerabilities, and exposure,  $L$  is a random variable whose cumulative distribution function (CDF)  $F_L(l)$  can be obtained by performing an event-based earthquake risk assessment for spatially distributed systems with the synthetic earthquake catalog...*

Additionally, we now introduce event-based earthquake risk assessment in the same section, as we detail in our response to the specific comment Nr. 11.

4. It is not clear why in the case study, two (very) different synthetic earthquake catalogs are used. What is the benefit of doing so? Are the results at any stage combined?

We compare the loss exceedance function associated with the building stock computed with two synthetic earthquake catalogs and choose the catalog that best represents historical evidence of losses. As a result, we observed that the nationwide catalog represents better the historical evidence of losses.

In addition, the SARA catalog only considers events near Valparaíso and Viña del Mar. Although it is sufficient for the building stock, it is not for the power network, which covers the entire country. Furthermore, the magnitude in the SARA catalog was sampled with standard Monte Carlo. In contrast, in the

nationwide catalog, the magnitude was sampled with Importance Sampling, thus it sampled extreme events more efficiently.

However, since we only compared the catalogs with the loss exceedance functions associated with the building stock, and since the paper now has more focus on comparing and discussing two approaches of loss disaggregation (see also the reply to general comment 1 and the replies to major comments 1 and 2 of Reviewer 1), we decided to report only results with the nationwide catalog, which now is simply referred to as the synthetic earthquake catalog.

5. There are different statements made by the authors that are not accompanied by evidence or references. I will provide examples of this in the specific comments section.

We answer to the specific comments below. We also read the paper again and added additional references and evidence in selected places.

6. Some of the conclusions of the paper are contradictory, between the two case studies.

The discussion and conclusion of the paper were significantly edited, so we hope that the contradictions identified by the reviewer were removed in the process.

7. Authors in my understanding are referring interchangeably to synthetic earthquake catalogs and stochastic event sets, whereas these are two very different representations. I suggest that the difference between them is explicitly mentioned, and also which representation is the one used in the proposed methodology.

We now specify throughout the manuscript that we work with a synthetic earthquake catalog, and we keep that term since it emphasizes the fact that the events are generated through a numerical model. However, we note that following Baker et al (2021, p. 280), as well as the cited references there, the terms "synthetic earthquake catalog" and "stochastic event set" may also be used interchangeably.

8. Case studies in 4.1 and 4.2 show an example for a single building. However, the EQ loss assessment explained with the equations in the paper is not a good approach for this type of assessment and is usually preferred only for portfolio assessments.

The case studies are highly idealized to demonstrate the principle of the methodology. The systems there could represent a single building, but also a system or portfolio (at an abstract level).

We reworded the descriptions of both case studies in such a way that they represent hypothetical building portfolios instead of single buildings.

9. A discussion about how the methodology performs in a case with multiple buildings and how the treatment of the spatial correlation may introduce changes with respect to the results of the two case studies presented.

The application of the methodology to the building stock and power network in the communes of Valparaíso and Viña del Mar in Chile, presented in Sections 5 and 6, illustrates the application of the methodology in the case of multiple assets (including buildings). The following discussion in Section 7 analyzes the results considering the correlation effects in the building stock (concentrated assets) and power network (sparse assets):

*(...) According to the employed model, extreme losses are more likely to occur by a combination of a less strong earthquake with larger-than-average ground motions (i.e., a large value of the inter-event term in the GMM). This effect occurs for the residential building stock, due to its spatial concentration, and not (or to a much smaller extent) for the power supply network, which is spatially distributed.*

Regarding the treatment of spatial correlation, a discussion about the influence of the spatial correlation in loss disaggregation in a building stock can be found in Gómez-Zapata et al (2022a), which we cite in the manuscript. In addition, we added a paragraph in Section 5.2.1:

*Different authors have also analyzed the effects of the spatial correlation in the losses (Goda and Hong, 2009; Jayaram and Baker, 2009a, b; Baker et al., 2021), and they conclude that it should be included in spatially distributed systems, otherwise, the loss exceedance function underestimates extreme events.*

10. Some decisions/assumptions made by the authors are not very clear. As for instance, why if the two case studies are located within the same area/country, different GMMs are used for each of them?

The models for the power network and building stock were developed independently by CIGIDEN in Chile (power network) and GFZ (building stock). One of the differences in the models is the choice of the GMM. However, as explained in L310-L315, their functional form *is similar, and therefore, their predictions do not differ significantly, as observed in previous studies (e.g., Hussain et al., 2020; Gómez-Zapata et al., 2022a). In particular, Hussain et al. (2020) found negligible differences in direct loss estimates for the residential building stock of Santiago de Chile after using these two GMMs to simulate the associated ground motion from subduction earthquake scenarios.*

## Specific comments

1. At the abstract, I suggest changing “risk management tasks” for “risk management activities”.

Amended.

2. At the abstract (and the introduction), it must be explained why the mentioned activities make use of scenarios of earthquake events.

We decided to keep the abstract short but added an additional explanation to the introduction part: *Scenario-based analysis enables the modeling and simulation of the complex processes and interactions during and after earthquake events, with a level of detailing that is not possible in a complete probabilistic hazard and risk analysis.*

3. In the abstract it says that earthquake scenarios are defined in terms of the loss exceedance. Is this referring to rates? Probabilities? If the latter, in which timeframes?

We modified the abstract to clarify that it refers to annual loss exceedance rates.

4. The introduction mentions that earthquake scenarios are the starting point for detailed risk assessments. However, this is not true nowadays and even more, today it is more common to carry out a fully probabilistic and event-based EQ risk assessment, and from the results (e.g., ELT), choose events to carry out scenario analyses.

We modified the original sentence to make clear that “detailed risk assessment” refers to scenario analyses.

5. The classic PSHA formulation by Esteva (missing reference) and Cornell, did not aim to generate synthetic earthquake catalogs or stochastic event sets (note that these two are not the same). This statement at the introduction must be revised and adjusted.

We revised the statement and the context in which it was written. The paragraph aims to review studies where one of the products is a set of selected earthquake scenarios, including cases when the selection is within a synthetic earthquake catalog. The classic PSHA formulation is still far from scenario selection; some intermediate steps, such as Monte Carlo PSHA and PSHA products (Baker et al, 2021), were missing in our text and this is now clarified.

Therefore, we moved the sentence to Section 2 to a new paragraph:

*Synthetic earthquake catalogs have been used in event-based probabilistic seismic hazard analysis (PSHA) and earthquake risk assessment (e.g., Salgado-Gálvez et al.,*

2018; Ferrario et al., 2022; Allen et al., 2022). PSHA aims to obtain the occurrence rate and distribution of ground motions, taking into account all possible earthquake scenarios (Cornell, 1968; Esteva, 1970). Event-based PSHA utilizes Monte Carlo simulation for sampling earthquake scenarios. Similarly, event-based earthquake risk assessment on spatially distributed systems utilizes synthetic earthquake scenarios for computing the losses, considering the spatial correlation in the ground motion and the vulnerability of the exposed assets (Baker et al., 2021).

6. L21: it says that the classic hazard disaggregation does not consider the losses of the affected systems. This is evident and correct since as authors mention, it has to do only with the hazard component. I suggest removing that sentence.

Albeit evident to the reviewer, the literature and discussion around loss disaggregation, compared to hazard disaggregation, is more limited. Therefore, we prefer to keep that sentence.

7. L25: what is the accumulated loss? Spatially accumulated? Temporal accumulation?

It is only spatially accumulated loss. We added a clarification in the text.

8. L28: please clarify if the return period mentioned is that one for the loss, and if so, it is worth highlighting that it is usually very different than the one of the event.

We added a clarification that the return period is the one for the loss:

*Rosero-Velásquez and Straub (2022) proposed a definition of a representative hazard scenario associated with a loss return period  $t$ , e.g., the 100-year loss, which in general does not correspond to the magnitude or intensity measure of the same return period.*

We decided to keep the distinction from the magnitude and the intensity measure to avoid confusion.

9. L47: I suggest adding “network” after power supply.

We added it to the text.

10. Authors refer along the text to seismic catalogs. A definition and comprehensive explanation of what these are, what they include, etc. is needed. On L48 for instance, it is not clear if authors are referring to historical catalogs, synthetic catalogs, or both. Only in L106 it is mentioned a “stochastic seismic catalog” which in the cat-risk modelling jargon is not common.

We adjusted the explanation to clarify that in the paper we work with a synthetic earthquake catalog. Since we define them as a set of earthquake scenarios

(L65), and we explain what we mean by earthquake scenario (L61), we already explain what they include (i.e., source parameters such as hypocentral location and magnitude)

11. Section 2 required adding a better description of event-based PSHA (plus the corresponding appropriate references). Also, I think that in this section is where the explanation between stochastic event-sets and synthetic catalogs must be included.

Please refer to the reply to specific comment Nr. 5.

12. L67: PGA and Sa are not inputs to assess the vulnerabilities but the losses to the exposed systems.

We corrected the sentence.

13. Section 2 also requires adding an explanation of event-based EQ risk assessment (including the appropriate references"

Please refer to the reply to specific comment Nr. 5.

14. The proposed methodology seems to work well in cases where only one source is controlling the EQ hazard and risk. Some discussion about its applicability in other (more common) contexts where multiple sources contribute to the overall EQ hazard and risk levels is required.

The methodology also works with more than one seismic source. We clarified in Section 2 that the PDF of the source parameters  $\theta$  "is obtained from one or more seismic source models". In addition, the occurrence model that generated the synthetic earthquake catalog utilized for the study area in Chile divides the subduction area into 7 seismic zones, i.e. 7 seismic sources. Therefore, the methodology has been tested in the manuscript with an application that considers multiple sources.

15. The explanation of Eq. 4 starting in L93 is only one way of treating the aleatory uncertainty in probabilistic risk assessments. Others (perhaps more efficient and with similar results) exist and must be mentioned and referenced.

We modified that explanation in the following way:

*The objective functions of Eq. (5) and (6) consist of the PDF (...) which can be approximated with conditional samples of losses. One way to account for the aleatory uncertainty in the modeled ground motions is to draw thousands of random samples (Silva, 2016) and propagate them to the loss metrics. However, performing this amount of loss evaluations for an entire seismic catalog (normally containing dozens of thousands of events) is computationally (too) expensive. Alternative ways consider active learning with Gaussian process models (Tomar and*



*Burton, 2021; Rosero-Velásquez and Straub, 2022), or using extreme value theory and the generalized Pareto distribution (Borzoo et al., 2021). Therefore, we propose to first perform only one loss evaluation for each scenario in the catalog (...). This methodology is an adaptation of the one proposed by Rosero-Velásquez and Straub (2022).*

16. A map with the epicenters could accompany Table 1 for a better understanding.

We added a note in Table 1 indicating that the geographical location of the epicenters is presented in the results, where they are compared with the resulting scenarios of the proposed approach.

17. L279: is that the original or the modified G-R relationship?

It is the original G-R relationship. However, since the event magnitudes in the synthetic catalog were sampled with Importance Sampling (IS), using a uniform distribution, that relationship is used for computing the IS weights and not for the sampling. We clarified that line in the text.

18. To me, it is not clear what is the purpose of using two (very) different synthetic EQ catalogs and why, if one covers the small (buildings) and larger (power network) areas, the other one is needed. Also, a comparison of the two catalogs (e.g., rates by bins) for the “common area” would be useful if authors decide to keep the two.

Please refer to our reply to general comment Nr. 4

19. Figure 5: the size of the dots as a function of Mw is not very visible in the maps.

We are aware of this issue. However, we could not find a better way of displaying the 20 000 scenarios of the catalog on a single map. In any case, one can see in the figure dots of different sizes, even though one cannot determine their exact magnitude. The intention is also to show the effect of the Importance Sampling, and now we highlight this in the text, Section 5.2: *The resulting catalog is depicted in Figure 5, in which one can observe that events of different magnitudes have similar spread within the seven seismic zones. We now also show in the figure the seven seismic zones defined by Poulos et al (2019).*

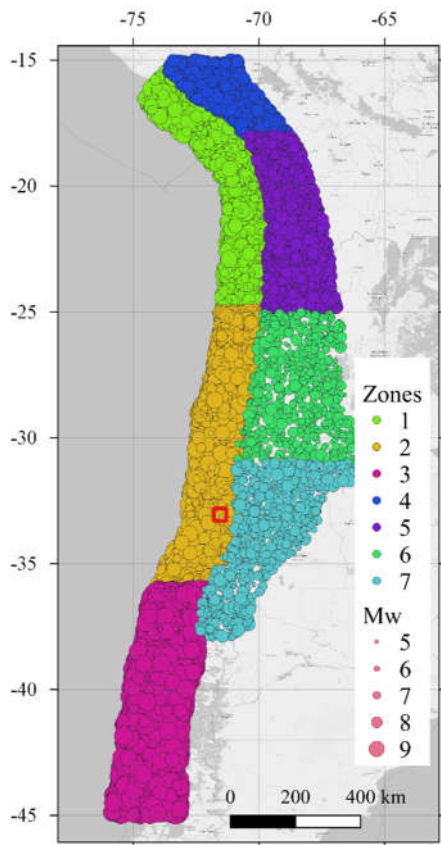

Figure 5. Synthetic earthquake catalog with 20 000 scenarios (Poulos et al., 2019). The circle size corresponds to the scenario magnitude. The red square contains the study area. Seismic zones 1 to 3 are of subduction interface type, and zones 4 to 7 are of subduction intra-slab type. Basemap from ©OpenStreetMap contributors 2023. Distributed under the Open Data Commons Open Database License (ODbL) v1.0.

20. L352: authors state that loss estimations are “similar” from  $10^8$  onwards, but the results shown in Figure 7 show a very different thing. The EP curves even overlap. Again, in this point is not clear what is the purpose and benefit of using two synthetic EQ catalogs.

Looking at Figure 7, the 100-year loss is around  $3 \times 10^8$  according to the curves obtained from both catalogs. The 50-year loss ranges between  $1.5$  and  $2 \times 10^8$  USD, the 500-year loss ranges between  $2 \times 10^9$  and  $3 \times 10^9$ , and the 1000-year loss between  $4 \times 10^9$  and  $5 \times 10^9$  USD. Taking the relative error of the log10-losses with respect to the nationwide catalog, the error is below 2% for the four loss quantiles. Therefore, we conclude that the loss estimations between the two exceedance curves are similar (in the sense of their log10s) for the range between the 50-year loss and the 1000-year loss.

Concerning the issue of using two synthetic earthquake catalogs, please refer to our reply to general comment Nr. 4. In consequence, now Figure 7 only shows the loss exceedance function with the nationwide catalog:

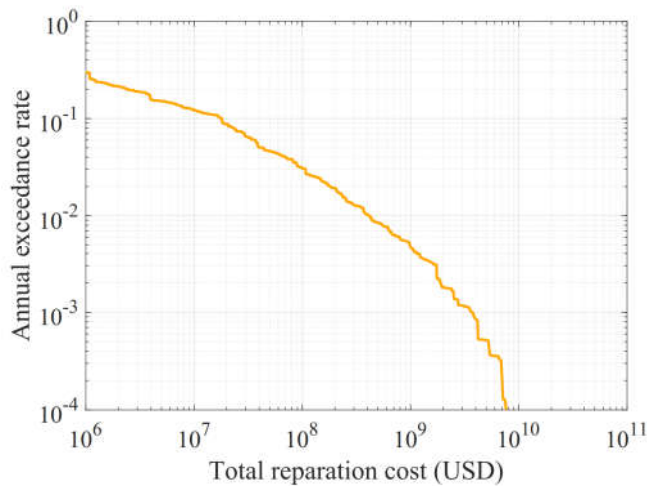

Figure 7. Loss-exceedance function of the reconstruction costs associated with the residential building stock in Valparaíso y Viña del Mar communes.

21. L362: a better justification of why the spread is deemed as acceptable is missing.

We modify the explanation:

*(...). In all evaluations, we found a spread of the identified representative scenarios, similar to that of Figure 4. This spread is larger for higher return periods, but most of the numerical solutions (11 out of 20 for the 1000-year loss return period and at least 16 out of 20 for the other loss return periods) have epicentral locations within a radius of 50km around the mode, and the coefficient of variation of the magnitude is below 4% for all return periods. (...)*

And added a similar one for the power network:

*The spread of the solutions obtained with the 20 runs is larger than the one of the residential building stock in epicentral locations. At least 13 solutions cluster around the sample mode within a radius of 100km, and the coefficient of variation of the magnitude is below 5% for all return periods*

22. The light purple color for RT 100yrs does not contrast well with the grey background in Figures 8, 10 and 11. It could be changed to other tone.

We modified the figures.

23. The discussion section includes some interesting conclusions and statements that can be better understood if more evidence or explanations are included. For instance, what useful validations can be made? (L394). Why the 500 and 1000yr scenarios are larger than the expected? (L397).

We modify the explanation of the referred lines in Section 7:

*(...) The fact that the scenarios identified with the proposed approach differ from the historical events selected in Indirli et al. (2011) should not be surprising, as the latter are in some sense just “random samples” of earthquake events. Nevertheless, the historical events can provide a useful validation of the identified scenarios. In this regard, the scenarios identified as representative of the power supply network appear to be in line with the historic events, as they cover geographic areas of similar sizes, as shown in Fig. 11b. The identified 500 and 1000-year scenarios have larger magnitudes than the historical events, which would also be expected since the historical events all come from a (roughly) 100-year period, see Table 1. By contrast, the representative scenarios identified for the building stock have significantly smaller magnitudes than the historical events. However, they occur much closer to the considered building stock. (...)*
